## RESEARCH ARTICLE

# Nutritional status of under-five aged children of ready-made garment workers in Bangladesh: A cross-sectional study

Sadika Haque<sup>1</sup>, Dewan Abdullah Al Rafi<sup>2</sup>, Nafisa Zaman<sup>1</sup>, Md. Salman<sup>1</sup>, Md. Abdullah Al Noman<sup>1</sup>, Md. Nazmul Hoque<sup>3</sup>, Lalita Bhattacharjee<sup>4</sup>, Samantha Farquhar<sup>5</sup>, Sabina Yasmin<sup>6</sup>, Md. Mehedi Hasan<sup>1</sup>, Fatema Tuj Zohora Hira<sup>1</sup>, Aunjaman Ara Prithi<sup>1</sup>, Shamim Ara Shammi<sup>1</sup>, Bilkish Banu<sup>7</sup>, Akbar Hossain<sup>8\*</sup>

**1** Department of Agricultural Economics, Bangladesh Agricultural University, Mymensingh, Bangladesh, **2** Department of Agricultural and Resource Economics, The University of Arizona, Tucson, Arizona, United States of America, **3** Student Affairs Division, Bangladesh Agricultural University, Mymensingh, Bangladesh, **4** Senior Nutrition Advisor, Meeting the Undernutrition Challenge Programme, Food and Agriculture Organization of the United Nations, Rome, Italy, **5** Integrated Coastal Sciences, East Carolina University, Greenville, North Carolina, United States of America, **6** Socio Economics Research Division, Bangladesh Livestock Research Institute, Savar Union, Bangladesh, **7** Faculty of Social Science and Humanities, Department of Economics, Hajee Mohammad Danesh Science & Technology University, Dinajpur, Bangladesh, **8** Division of Soil Science, Bangladesh Wheat and Maize Research Institute, Dinajpur, Bangladesh

\* [akbarhossainwrc@gmail.com](mailto:akbarhossainwrc@gmail.com)

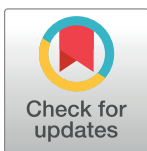

## OPEN ACCESS

**Citation:** Haque S, Al Rafi DA, Zaman N, Salman M., Al Noman M.A, Hoque M.N, et al. (2023) Nutritional status of under-five aged children of ready-made garment workers in Bangladesh: A cross-sectional study. PLoS ONE 18(4): e0284325. <https://doi.org/10.1371/journal.pone.0284325>

**Editor:** Farooq Ahmed, Quaid-i-Azam University Islamabad: Quaid-i-Azam University, PAKISTAN

**Received:** February 8, 2022

**Accepted:** March 28, 2023

**Published:** April 13, 2023

**Copyright:** © 2023 Haque et al. This is an open access article distributed under the terms of the [Creative Commons Attribution License](https://creativecommons.org/licenses/by/4.0/), which permits unrestricted use, distribution, and reproduction in any medium, provided the original author and source are credited.

**Data Availability Statement:** All relevant data are within the paper and its [Supporting Information](#) files. We also confirm that data are fully available without restriction.

**Funding:** Financial support was made by a part of MUCH-project of The Food and Agricultural Organization of The UN, (Grant number: GCP/BGD/063/EC/1506544). The funders had no role in study design, data collection and analysis, decision to publish, or preparation of the manuscript.

## Abstract

### Background

The ready-made garment (RMG) sector is a significant contributor to the economic growth of Bangladesh, accounting for 10% of the country's GDP and more than 80% of its foreign exchange earnings. The workforce in this sector is predominantly made up of women, with 2.5 million women working in the industry. However, these women face numerous challenges in carrying out their culturally-expected household responsibilities, including child-care, due to severe resource constraints. As a result, the children of these working women have a higher incidence of malnutrition, particularly stunted growth. This study aims to identify the factors that contribute to stunting in children under the age of five whose mothers work in the RMG sector in Bangladesh.

### Methods

The study collected data from 267 female RMG workers in the Gazipur district of Bangladesh using a simple random sampling technique. Chi-square tests were used to determine the associations between the factors influencing child stunting, and Multinomial Logit Models were used to estimate the prevalence of these factors.

### Results

The study found that the prevalence of moderate and severe stunting among the children of RMG workers living in the Gazipur RMG hub was 19% and 20%, respectively. The study

**Competing interests:** The authors have declared that no competing interests exist.

**Abbreviations:** AIC, Akaike information criterion; ANC, Antenatal care; BMI, Body mass index; CDC, Centers for Disease Control and Prevention; CI, Confidence interval; CPD, Center for Policy Dialogue; FANTA, Food and Nutrition Technical Assistance III Project; FAO, Food and Agricultural Organization; HAZ, Height for age Z score; ORS, Oral saline; RMG, Ready-made garments; UNICEF, United Nations Children's Fund; USAID, United State Agency for International Development; WHO, World Health Organization.

identified several significant predictors of child stunting, including the mother's education level, nutritional knowledge, control over resources, receipt of antenatal care, household size, sanitation facilities, and childbirth weight. The study found that improving the mother's education level, increasing household size, and receiving antenatal care during pregnancy were important factors in reducing the likelihood of child stunting. For example, if a mother's education level increased from no education to primary or secondary level, the child would be 0.211 (0.071–0.627) and 0.384 (0.138–1.065) times more likely to have a normal weight and height, respectively, than to be moderately stunted.

## Conclusion

The study highlights the challenges faced by working women in the RMG sector, who often receive minimal wages and have limited access to antenatal care services. To address these challenges, the study recommends policies that support antenatal care for working-class mothers, provide daycare facilities for their children, and implement a comprehensive social safety net program that targets child nutrition. Improving the socioeconomic status of mothers is also critical to reducing child malnutrition in this population.

## Background

In the last 40 years, the ready-made garment (RMG) sector has been contributing as one of the most important driving forces behind Bangladesh's economic development, for which the country has turned out as the second-largest exporter of garment products globally [1]. The recent nature of development and urbanization has forced women to join the workforce in the formal sector but retaining with their domestic (cleaning, cooking, washing, taking care of children and elderly etc.), biological (child birth, breast feeding etc.), and cultural (leading the family while men are absent) responsibilities [2], turning their livelihood time burden more and more challenging. It is estimated that about 4.22 million workers are employed in this sector, among them 2.50 million are female [3]. Most of the RMG workers migrated from rural to urban areas, struggling with poverty in their places of origin and could not afford to continue studying [4], for which they opted to join the RMG factory as their last resort. Although the RMG industry has provided these women with the first opportunity to enter into the formal workforce, offering a substantial source of income, and economic independence, they mostly live in places of urban areas with bare minimum civic facilities (hospitals, schools, sports fields, fire stations, public transport, daycare centres etc.), have to work for more than 8 hours per day, and to make matters worse, are poorly paid (monthly pay ranges between USD \$100–160) compared to their cost of basic needs [5]. Consequently, these young, inexperienced women have to compromise their health needs and be entitled to marginal health status. Many of them, at the same time, are mothers and wives, who are obligated to perform culturally-expected responsibilities in their households. Needless to mention that playing the role of both professional worker and full-time caretaker is of immense difficulty for these RMG women workers and often the health and nutrition of their children are negatively affected. Previous research has shown that child health is linked to poor access to health services, poor nutritional quality, lack of decent living conditions, shortage of adequate maternity protection, inadequate breastfeeding support, poor access to quality childcare, long working hours, and low education [6]. Yet, the nutritional status of RMG working mothers and their children has rarely been explored by researchers and policymakers.

A standard indicator of malnutrition in the case of children under the age of five is stunting which reflects the cumulative effects of poor maternal health and nutrition (like low maternal weight), frequent illness (diarrhoea, fever etc.), inappropriate feeding, food insecurity and improper care in the first 1000 days of life [7]. In addition, malnutrition hits its highest point at the age of 18 to 35 months of the child age, the complementary breast-feeding period [8]. The major consequences of stunting include poor cognitive development and educational performance, lost productivity accompanied by obesity in later childhood, and an increased risk of nutrition-related chronic diseases in adult life [9]. The rates of stunting for children under five years recorded in Bangladesh were 31% [10] and 28% [9,11,12] whereas the worldwide rate is 21.3% [13].

Different variables have been investigated as influential predictors for the stunting of <5 years of children. Zongrone et al. [14] highlighted the importance of infant and young child feeding (IYCF) practices and dietary diversity as determinants of child growth outcomes. Bairagi and Chowdhury [15] found that socioeconomic status and anthropometric indices are related to child mortality and health. Mothers' nutritional status, and body mass index (BMI), have also been used as a predictor of child nutritional status, where some studies specifically found that the children of mothers, who have a higher BMI, are less likely to be stunted [8,16–26]. Other studies found that mothers' education has a significant impact on a child's nutritional status [8,16–30]. However, some authors have opposed this statement since they found mothers' education as insignificant possibly due to the quality of education received [30–32]. Some studies indicated that a mother's practical knowledge about nutrition might be more important than formal maternal education for child nutrition outcomes [21,33]. Some of the studies have emphasized that during antenatal care (ANC) visits, doctors and health professionals provide important facts related to child health and some clinical services, and thus better ANC facilitate improved child nutrition [26,34,35].

Households' socioeconomic status is another predictor of stunting and nutritional status. Different authors found that a child from a higher wealth-indexed family is less likely to be stunted or malnourished because of a higher ability to buy diverse diets and health-seeking behaviour [8,19,21,35–43]. For example, a family with substantial financial and social capital can ensure an improved sanitation facility and safe drinking water, resulting in reduced stunting [8,15,27,36,37,44–46]. Similarly, improved sanitation mitigates the risk of diarrhoea which reduces the risk of malnutrition [20,44,47–53]. Previous studies also found that a large family size increases the risk of under-five child stunting because it increases food insecurity for family members [21,32,54–58]. Yet, some findings [59,60] contradict the fact that a large family size often reduces the risk of stunting because, in a large family, more people may be available to take care of the children when the mother is outside of the home for a long period.

Given the food and nutritional vulnerabilities of RMG workers and their children, along with the continued growth of the RMG sector, there is a need to understand the status of malnutrition and to scrutinize the factors affecting the nutritional status of RMG workers' children. Therefore, this study is an attempt to recognize the social, institutional and financial factors influencing the stunted growth of under-five aged children and to provide policy recommendations.

## Methods

### Sample size and sampling technique

The population size of RMG workers is 120242 [3]. This study took the 20% portion of the population to estimate the sample size. The following method is used when the population is

finite [61].

$$n = N \times \frac{\frac{Z^2 \times p \times (1-p)}{e^2}}{N - 1 \times \frac{Z^2 \times p \times (1-p)}{e^2}}$$

N = Population size (120242); Z = precession level at 95% confidence interval (1.96); p = proportion of the population (20%); e = error margin (5%).

Through this calculation, it was found that at least 245 samples are needed to represent the population based on the above information. Based on demographic background, child health, and nutrition, a questionnaire was used to collect data from targeted respondents through a simple random sampling technique. Overall, 267 samples were collected from RMG workers who have children under five years of age. The process of calculating the population size is as follows (Fig 1):

### Data collection

Primary data was obtained from the direct field surveys, conducted in the Gazipur district between June and September 2020. These surveys focused solely on women in the RMG sector. This district was chosen as almost 60% of the RMG factories are located in Dhaka and Gazipur districts in Bangladesh [62]. A survey was conducted using a simple random sampling technique to collect data from 267 women RMG workers who have at least one biological child aged between 6 to 59 months. Anthropometry measurements of women and children were conducted using instruments of exact precision, such as digital weight measuring scales, wooden height measuring scales, and standard tape for measuring Mid-Upper Arm Circumference (MUAC). The weight of mothers and children was recorded in kilograms, and height and MUAC were recorded on a centimetres scale. The digital weight measuring scales were calibrated before each measurement, and the weight was recorded three times. The average of the three measurements was used during the analysis. Enumerators received 5-day training to provide guidelines for quality data collection and anthropometric measurements. Before the interview, respondents provided consent for themselves as well as their under-5 aged children (as their guardians of the minors) included in the study. A pretested structured questionnaire was used to collect the required data from the RMG working mothers.

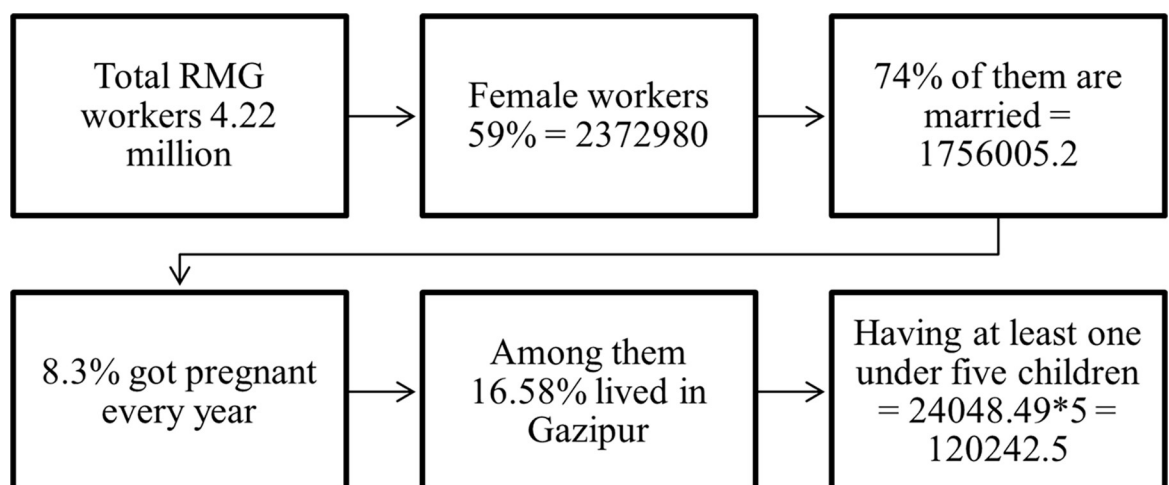

Fig 1. Determination of population size. Source: [3].

<https://doi.org/10.1371/journal.pone.0284325.g001>

## Inclusion and exclusion criteria

Data was collected on socio-demographic information that included age, wealth status, household size, household sanitation practices, education level, nutrition knowledge, health care seeking during pregnancy, childcare practices, mother and child dietary patterns, and more. The study maintained certain criteria for selecting samples while collecting data. For example, we only considered and interviewed RMG workers who accompanied their youngest, biological, and single-tone outcome child, ranging in age between 6–59 months. We avoided those who did not know the birth weight of their child, or did not have any record of birth weight, as well as those who did not allow us to measure their height, weight, and MUAC, as well as their child's. We also did not include any pregnant women in the study.

## Variable description

**Outcome variable.** Anthropometry data (height/length and weight) and age were used to estimate the Height-for-Age (HAZ) index. WHO Multicenter Growth Reference Study (MGRS) 2006 Child Growth Standards were followed [63] and WHO Anthro version 3.2.2 was used to calculate the Z-score for HAZ. Less than -2 Standard deviation (SD) Z-score of HAZ was considered as stunted [64]. Moderate and severe stunting were defined when Z-scores for HAZ ranged between -2SD to -3SD and  $< -3SD$  respectively [65].

**Predictor variables.** Various demographic and socioeconomic characteristics of children and mothers, antenatal care status of mothers, and evidence about caregiver and daycare centre, were used as predictor variables. Variables were classified into several groups by following the standard guidelines and previous literature.

Mothers' education was recorded based on completed years of formal schooling and further classified into different categories (no education, primary [1–5 years], secondary [6–10 years], higher secondary and more [ $>10$  years]). To assess the mother's nutrition knowledge, six relevant questions with binary answers were asked and assigned values 1 for "yes" and 0 for "no". All the scores were summed up and then categorized into three groups: poor, fair, and good. The poor category was defined as the 0% to 50% range, the fair category between the 51 to 75% range, and the good category as the 76 to 100% range [66]. Women's access to and control over financial resources describes whether the respondent mother can decide to spend her own income and/or she can spend the earning of her husband. This variable was termed as control over financial resources in McKenna et al. [67].

Antenatal care was a binary variable representing whether the mothers had received the ANC at least 4 times or not during pregnancy. Household size was measured by the number of household members currently living in the family "Guideline for Sanitation and Health" developed by WHO [68] was used to measure sanitation, which was then categorized into two classes: proper and improper. Improved sanitation was defined as the use of facilities such as piped sewer systems, septic tanks, off-set pit latrines with slab, and dual pit latrines, while unimproved sanitation included direct pit latrines with slab, direct pit latrines without slab, hanging toilets, and others. This variable is dichotomous. Birth weight was classified as a binary variable by using a threshold of 2.5 kg at the time of the baby's birth. If a baby's birth weight was less than 2.5 kilograms, it is then classified as low birth weight (LBW) [69]. One additional dummy variable was created to represent the caregivers' knowledge of dietary diversity, which refers to their understanding of proper nutrition while caring for the child in the absence of the mother. A binary variable was also created to indicate whether the child was being cared for at a daycare center or home.

## Statistical analyses

Descriptive and inferential analyses were performed using STATA 17.0 software to evaluate the predictors of stunting. Descriptive analysis was used to show the frequency distribution of different variables. The Pearson Chi-square test was conducted to test the association between background characteristics and stunting prevalence. This test measures the relationship between the categorical outcome variable and the other categorical predictors.

For the inferential analysis, a logit model, specifically a multinomial logit regression, was used because the outcome variables had more than two categories [70]. The multinomial logistic model calculates the probability of each outcome as follows:

$$P_{ij} = \frac{e^{\sum_{j=1}^k \alpha + \beta_{kj} + \kappa_{kji}}}{\sum_{j=1}^J e^{\sum_{j=1}^k \alpha + \beta_{kj} + \kappa_{kji}}}$$

where  $i$  represents the cases,  $j$  represents the categories, and  $k$  represents the predictor variables. The exponential of the beta coefficient, also known as the relative risk ratio (RRR), was used to explain the result of the regression [71]. Four separate models were used, with mothers' education being categorical (based on different levels of education stages in Bangladesh) and continuous (years of schooling). Two separate models were estimated, keeping them separate. A similar technique was used for mothers' nutrition knowledge, which was assessed based on knowledge scores and categorized as poor, fair, and good. The best-fitted model was identified based on the lowest Akaike Information Criteria (AIC) [72].

Post-estimation tests were also conducted to check the assumption of independence of irrelevant alternatives (see Supplementary Materials).

## Ethical considerations

The study protocol was reviewed and approved by the institutional review board of the Bangladesh Agricultural University Research System (BAURES) and accepted by the Technical Assistant Team (TAT) of the MUCH project of the Food and Agricultural Organization of the United Nations prior to commencing the study. Respondents were informed that the information gathered would only be used for research purposes. After providing a detailed description of the research, participants signed a written consent form, which was securely kept. To protect participants' rights, research enumerators were trained on the research protocol and ethical principles of human subjects research. The confidentiality of information was strictly maintained, and all participants were assigned unique identifying numbers. The enumerators and the entire research team stored data in locked filing cabinets and on password-protected computers.

## Results

### Descriptive and Bivariate analysis

When the Z-score of stunting was categorized, it was found that 38% of children were stunted, with 19% being severely stunted and 19% being moderately stunted. The remaining children were either normal or not stunted, as shown in [Table 1](#).

The mother's year of schooling represents the number of years she attended school, and the average year of schooling for the mothers in the study was 5.79 years. This variable was further classified into different groups, with 17% of mothers having no education, 33% having up to primary education, 42% having up to secondary education, and the remaining 8% having higher secondary or higher levels of education.

Table 1. Description of the study variables.

| Variables                                   | Mean $\pm$ SD   | Min, Max | Frequency (Percentage) |
|---------------------------------------------|-----------------|----------|------------------------|
| Stunting                                    |                 |          |                        |
| Severely stunted                            |                 |          | 52 (19.48)             |
| Moderately stunted                          |                 |          | 51 (19.10)             |
| Normal (not stunted)                        |                 |          | 164 (61.42)            |
| Mother's year of schooling                  | 5.79 $\pm$ 3.48 | 0,14     |                        |
| Mothers' education                          |                 |          |                        |
| No education                                |                 |          | 46 (17.23)             |
| Primary                                     |                 |          | 88 (32.96)             |
| Secondary                                   |                 |          | 112 (41.95)            |
| Higher secondary and more                   |                 |          | 21 (7.87)              |
| Household size                              | 3.78 $\pm$ 0.92 | 2, 8     |                        |
| Sanitation facilities                       |                 |          |                        |
| Unimproved                                  |                 |          | 82 (30.71)             |
| Improved                                    |                 |          | 185 (69.29)            |
| Birth Weight                                |                 |          |                        |
| Less than or equal to 2.5 kg                |                 |          | 71 (26.59)             |
| Greater than 2.5 kg                         |                 |          | 196 (73.41)            |
| ANC service                                 |                 |          |                        |
| Haven't received                            |                 |          | 28 (10.49)             |
| Received                                    |                 |          | 239 (89.51)            |
| Control over resources                      |                 |          |                        |
| No                                          |                 |          | 116 (43.45)            |
| Yes                                         |                 |          | 151 (56.55)            |
| Caregiver knowledge about dietary diversity |                 |          |                        |
| No                                          |                 |          | 64 (23.97)             |
| Yes                                         |                 |          | 203 (76.03)            |
| Mother's nutrition knowledge (score)        | 0.57 $\pm$ 0.16 | 0.167, 1 |                        |
| Mother's nutrition knowledge                |                 |          |                        |
| Poor                                        |                 |          | 117 (43.82)            |
| Fair                                        |                 |          | 131 (49.06)            |
| Good                                        |                 |          | 19 (7.12)              |
| Child stay at daycare                       |                 |          |                        |
| No                                          |                 |          | 169 (63.3)             |
| Yes                                         |                 |          | 98 (36.7)              |

<https://doi.org/10.1371/journal.pone.0284325.t001>

Mothers' nutritional knowledge mentioned above was assessed from the six nutrition-related questions which are represented below.

The study also found that the average household size was 3.78, with a minimum of 2 members. Additionally, 69% of families had improved sanitation facilities, and almost 73% of children were born with a birth weight of more than 2.5 kg.

In terms of healthcare, RMG workers rarely visited doctors and only sought medical attention in case of extreme emergencies. Nearly 90% of respondents visited doctors or health clinics two or fewer times to receive ANC services. Despite earning their own income, only 57% of respondents had control over their resources. When mothers went to work, they left their children with either relatives or non-relative caregivers. Almost 76% of these caregivers were aware of the child's dietary diversity.

The mean value of mothers' nutritional knowledge score was 0.57, which was further classified into three categories. Of the mothers, 44% had poor nutritional knowledge, 49% had fair knowledge, and the remaining 7% had good nutritional knowledge. Finally, daycare facilities in RMG industries in Bangladesh were found to be a recent addition. 37% of respondents' children were placed in poorly managed daycare centres during their parents' work hours.

Most of the mothers (92%) believed that only fat babies were not healthy (Table 1). On the other hand, the majority (97%) of the mothers knew that feeding colostrum to a baby was important, and nearly 82% of mothers introduced semi-solid foods to their child when their child turned 6 months old. Around 87% of mothers provided oral rehydration solution (ORS) as a fluid when their children were suffering from diarrhoea. About 58% of the mothers knew that they should consume fruits, vegetables, and other nutrition-rich foods every day. Around 87% of mothers had a negative perception of fast food and did not tend to provide it regularly to their children (Table 2). After summing up all the positive responses, the final score was divided by 6 so that the extent of mothers' nutritional knowledge scale lies between the range of 0 to 1. Furthermore, it was multiplied by 100 for better understanding. With exception of ANC services, all the other variables were found significantly associated with childhood stunting at a different significance level through the Pearson chi-squared test. (Table 3).

## Regression results

The study used relative risk ratio (RRR) to explain the result of the best-fitted regression model. Akaike information criteria (AIC) have been found lowest in model 4 and it has been chosen as the best-fitted model (Table 4). From the model, it was found that if mothers' education shifts from no education to up to the primary, the child would be 0.211 (95% CI: 0.071–0.627) times more likely to have a normal weight and height than moderately stunted and if mothers' education shifts from no education to up to secondary, then the child would be 0.384 (95% CI: 0.138–1.065) times more likely to have a normal weight and height than moderately stunted. When the household size increases by one person, the child would become 0.62 (95% CI: 0.401–0.965) times more likely to be normal than being severely stunted and 0.65 (95% CI: 0.423–1.02) times more likely to be normal than moderately stunted. When the family has an improved sanitation facility, the child would be 0.46 (95% CI: 0.208–1.06) times more likely to have normal weight and height than severely stunted and 0.31 (95% CI: 0.137–0.707) times more likely to have normal weight and height than moderately stunted (Table 3). Children with more than 2.5 kg birth weight would have 0.34 (95% CI: 0.159–0.751) times more likelihood to be normal than severely stunted and 0.31 (95% CI: 0.146–0.677) times more likely to be normal than moderately stunted. Mothers' who received ANC during their pregnancy, their children would have 0.328 (95% CI: 0.105–1.026) times more likely of being normal than severely stunted and 0.23 (95% CI: 0.077–0.726) times more likely of being normal than

**Table 2. The extent of mothers' nutritional knowledge.**

| Responses                                              | No          | Yes         |
|--------------------------------------------------------|-------------|-------------|
| Think fat baby is not healthy                          | 20 (7.49)   | 247 (92.51) |
| Feeding colostrum to a baby is important               | 8 (3.00)    | 259 (97.00) |
| Introduce semi-solid foods to child                    | 48 (17.98)  | 219 (82.02) |
| ORS should be provided who suffer from diarrhoea       | 34 (12.73)  | 233 (87.27) |
| At least 5 colours of food should we consume every day | 113 (42.32) | 154 (57.68) |
| Children should not regularly consume fast foods       | 34 (12.73)  | 233 (87.27) |

Frequency (percentage).

<https://doi.org/10.1371/journal.pone.0284325.t002>



**Table 3. Distribution of stunting of ready-made garment workers' children under the age of five according to different factors.**

| Variables                                   | Stunting           |                    |                     | Chi-square | P-value |
|---------------------------------------------|--------------------|--------------------|---------------------|------------|---------|
|                                             | Severely stunted   | Moderately stunted | Normal              |            |         |
| Mothers' education                          |                    |                    |                     |            |         |
| No education                                | 11 (23.91) (21.15) | 14 (30.43) (27.45) | 21 (45.65) (12.8)   | 14.77      | 0.0221  |
| Primary                                     | 19 (21.59) (36.54) | 10 (11.36) (19.61) | 59 (67.05) (35.98)  |            |         |
| Secondary                                   | 19 (16.96) (36.54) | 19 (16.96) (37.25) | 74 (66.07) (45.12)  |            |         |
| Higher secondary and more                   | 3 (14.29) (5.77)   | 8 (38.1) (15.69)   | 10 (47.62) (6.1)    |            |         |
| Sanitation facilities                       |                    |                    |                     |            |         |
| Unimproved                                  | 18 (21.95) (34.62) | 22 (26.83) (43.14) | 42 (51.22) (25.61)  | 6.08       | 0.0479  |
| Improved                                    | 34 (18.38) (65.38) | 29 (15.68) (56.86) | 122 (65.95) (74.39) |            |         |
| Birth Weight                                |                    |                    |                     |            |         |
| Less than or equal to 2.5 kg                | 19 (26.76) (36.54) | 21 (29.58) (41.18) | 31 (43.66) (18.9)   | 13.16      | 0.0014  |
| Greater than 2.5 kg                         | 33 (16.84) (63.46) | 30 (15.31) (58.82) | 133 (67.86) (81.1)  |            |         |
| ANC service                                 |                    |                    |                     |            |         |
| Haven't received                            | 8 (28.57) (15.38)  | 8 (28.57) (15.69)  | 12 (42.86) (7.32)   | 4.55       | 0.1026  |
| Received                                    | 44 (18.41) (84.62) | 43 (17.99) (84.31) | 152 (63.6) (92.68)  |            |         |
| Control over resources                      |                    |                    |                     |            |         |
| No                                          | 31 (26.72) (59.62) | 19 (16.38) (37.25) | 66 (56.9) (40.24)   | 7.01       | 0.03    |
| Yes                                         | 21 (13.91) (40.38) | 32 (21.19) (62.75) | 98 (64.9) (59.76)   |            |         |
| Caregiver knowledge about dietary diversity |                    |                    |                     |            |         |
| No                                          | 20 (31.25) (38.46) | 10 (15.63) (19.61) | 34 (53.13) (20.73)  | 7.47       | 0.0239  |
| Yes                                         | 32 (15.76) (61.54) | 41 (20.2) (80.39)  | 130 (64.04) (79.27) |            |         |
| Child stay at daycare                       |                    |                    |                     |            |         |
| No                                          | 32 (18.93) (61.54) | 33 (19.53) (64.71) | 104 (61.54) (63.41) | 0.11       | 0.09447 |
| Yes                                         | 20 (20.41) (38.46) | 18 (18.37) (35.29) | 60 (61.22) (36.59)  |            |         |
| Mother's nutrition knowledge                |                    |                    |                     |            |         |
| Poor                                        | 24 (20.51) (46.15) | 24 (20.51) (47.06) | 69 (58.97) (42.07)  | 1.33       | 0.08558 |
| Fair                                        | 24 (18.32) (46.15) | 25 (19.08) (49.02) | 82 (62.6) (50)      |            |         |
| Good                                        | 4 (21.05) (7.69)   | 2 (10.53) (3.92)   | 13 (68.42) (7.93)   |            |         |

Frequency (row relative percentage) (column relative percentage).

Row relative percentages were used to chi-square test and column relative percentages were used to describe the distribution of variables.

<https://doi.org/10.1371/journal.pone.0284325.t003>

moderately stunted. When mothers have control over their income, their child would become 0.26 (95% CI: 0.079–0.88) times more likely to be of normal weight and height than severely stunted. An increase in one unit of mothers' nutritional knowledge score increases the chance for the child to be normal than moderately stunted by 0.059 (95% CI: 0.005–0.683) times (Table 4).

## Discussion

In general, and since time immemorial, mothers have been the principal household caregivers, especially for infants and children, throughout the world. Such caregiving responsibility became more and more challenging for contemporary working mothers, given their multiple burdens of responsibilities. In this case, the RMG women workers in Bangladesh have to work for long hours in the factories which in turn severely affects the health and nutrition outcomes for themselves as well as for their children. In line with this, many of the RMG women workers had the experience of early marriages, they lacked access to ANC services and hardly visited doctors, hospitals and healthcare centres [73]. The study found that as a mother's educational

**Table 4. Factors influencing stunting of ready-made garment workers' children under the age of five: Multinomial logit regression model.**

| Stunting (normal)                                  | RRR Sig<br>(95% Confidence Interval) |                          |                           |                           |                          |                          |                           |                           |
|----------------------------------------------------|--------------------------------------|--------------------------|---------------------------|---------------------------|--------------------------|--------------------------|---------------------------|---------------------------|
|                                                    | Model 1                              |                          | Model 2                   |                           | Model 3                  |                          | Model 4                   |                           |
|                                                    | AIC = 480.157                        |                          | AIC = 483.25              |                           | AIC = 478.62             |                          | AIC = 474.882             |                           |
|                                                    | Severely stunted                     | Moderately stunted       | Severely stunted          | Moderately stunted        | Severely stunted         | Moderately stunted       | Severely stunted          | Moderately stunted        |
| Mother's year of schooling                         |                                      |                          | 0.944<br>(0.845–1.054)    | 0.951<br>(0.857–1.056)    | 0.954<br>(0.854–1.067)   | 0.974<br>(0.875–1.083)   |                           |                           |
| Mother's education (no education)                  |                                      |                          |                           |                           |                          |                          |                           |                           |
| Up to primary                                      | 0.518<br>(0.18–1.491)                | 0.2***<br>(0.067–0.594)  |                           |                           |                          |                          | 0.522<br>(0.181–1.505)    | 0.211***<br>(0.071–0.627) |
| Up to secondary                                    | 0.5<br>(0.169–1.483)                 | 0.316**<br>(0.116–0.863) |                           |                           |                          |                          | 0.539<br>(0.18–1.613)     | 0.384*<br>(0.138–1.065)   |
| Higher secondary                                   | 0.445<br>(0.078–2.527)               | 0.77<br>(0.187–3.18)     |                           |                           |                          |                          | 0.503<br>(0.088–2.876)    | 0.999<br>(0.237–4.205)    |
| Household size                                     | 0.62**<br>(0.4–0.962)                | 0.643**<br>(0.414–0.999) | 0.611**<br>(0.394–0.948)  | 0.63**<br>(0.41–0.968)    | 0.616**<br>(0.397–0.954) | 0.64**<br>(0.417–0.983)  | 0.622**<br>(0.401–0.965)  | 0.657*<br>(0.423–1.02)    |
| Improved sanitation practice (unimproved)          |                                      |                          |                           |                           |                          |                          |                           |                           |
| Improved                                           | 0.469*<br>(0.206–1.067)              | 0.29***<br>(0.128–0.672) | 0.468*<br>(0.209–1.047)   | 0.308***<br>(0.141–0.674) | 0.477*<br>(0.216–1.057)  | 0.33***<br>(0.153–0.715) | 0.469*<br>(0.208–1.06)    | 0.311***<br>(0.137–0.707) |
| Birth weight (less than or equal 2.5 kg)           |                                      |                          |                           |                           |                          |                          |                           |                           |
| Greater than 2.5 kg                                | 0.34***<br>(0.155–0.746)             | 0.29***<br>(0.132–0.625) | 0.324***<br>(0.148–0.707) | 0.267***<br>(0.125–0.568) | 0.33***<br>(0.152–0.715) | 0.291***<br>(0.138–0.61) | 0.345***<br>(0.159–0.751) | 0.314***<br>(0.146–0.677) |
| Antenatal care (did not receive)                   |                                      |                          |                           |                           |                          |                          |                           |                           |
| Received                                           | 0.334*<br>(0.107–1.043)              | 0.241**<br>(0.078–0.74)  | 0.341*<br>(0.11–1.053)    | 0.286**<br>(0.096–0.851)  | 0.336*<br>(0.108–1.039)  | 0.28**<br>(0.095–0.83)   | 0.328*<br>(0.105–1.026)   | 0.237**<br>(0.077–0.726)  |
| Control over resources (no)                        |                                      |                          |                           |                           |                          |                          |                           |                           |
| Yes                                                | 0.228**<br>(0.072–0.723)             | 1.519<br>(0.362–6.379)   | 0.221***<br>(0.071–0.688) | 1.607<br>(0.367–7.038)    | 0.254**<br>(0.078–0.827) | 1.887<br>(0.464–7.679)   | 0.264**<br>(0.079–0.88)   | 1.942<br>(0.47–8.031)     |
| Caregiver's knowledge about dietary diversity (no) |                                      |                          |                           |                           |                          |                          |                           |                           |
| Yes                                                | 0.442**<br>(0.2–0.976)               | 0.843<br>(0.34–2.091)    | 0.451**<br>(0.206–0.988)  | 0.89<br>(0.37–2.14)       | 0.42**<br>(0.191–0.926)  | 0.854<br>(0.356–2.049)   | 0.407**<br>(0.183–0.906)  | 0.818<br>(0.329–2.034)    |
| Mother's nutrition knowledge                       |                                      |                          |                           |                           | 0.302<br>(0.028–3.315)   | 0.102*<br>(0.01–1.043)   | 0.275<br>(0.024–3.124)    | 0.059**<br>(0.005–0.683)  |
| Mother's nutrition knowledge (category) (poor)     |                                      |                          |                           |                           |                          |                          |                           |                           |
| Fair                                               | 0.992<br>(0.448–2.196)               | 0.92<br>(0.43–1.969)     | 1.027<br>(0.464–2.276)    | 1.064<br>(0.509–2.221)    |                          |                          |                           |                           |

(Continued)

Table 4. (Continued)

| Stunting (normal)          | RRR Sig<br>(95% Confidence Interval) |                    |                  |                    |                  |                    |                   |                    |
|----------------------------|--------------------------------------|--------------------|------------------|--------------------|------------------|--------------------|-------------------|--------------------|
|                            | Model 1                              |                    | Model 2          |                    | Model 3          |                    | Model 4           |                    |
|                            | AIC = 480.157                        |                    | AIC = 483.25     |                    | AIC = 478.62     |                    | AIC = 474.882     |                    |
|                            | Severely stunted                     | Moderately stunted | Severely stunted | Moderately stunted | Severely stunted | Moderately stunted | Severely stunted  | Moderately stunted |
| Good                       | 0.577                                | 0.189*             | 0.577            | 0.262              |                  |                    |                   |                    |
|                            | (0.141–2.362)                        | (0.03–1.178)       | (0.142–2.348)    | (0.046–1.488)      |                  |                    |                   |                    |
| Child stay at daycare (no) |                                      |                    |                  |                    |                  |                    |                   |                    |
| Yes                        | 0.284*                               | 1.257              | 0.263**          | 1.14               | 0.317*           | 1.47               | 0.338             | 1.724              |
|                            | (0.078–1.033)                        | (0.284–5.558)      | (0.076–0.91)     | (0.254–5.119)      | (0.091–1.106)    | (0.355–6.092)      | (0.092–1.248)     | (0.398–7.477)      |
| Constant                   | 206.3***                             | 74.2***            | 178.2***         | 32.138**           | 282.746***       | 72.531***          | 362.95***         | 192.09***          |
|                            | (14.868–2861.70)                     | (4.471–1233.1)     | (13.663–2324.83) | (2.211–467.039)    | (17.591–4544.64) | (4.156–1265.8)     | (20.442–6444.169) | (9.321–3958.511)   |

\*\*\*1%, \*\*5%, \*10% level of significance; Source: Authors' calculation.

<https://doi.org/10.1371/journal.pone.0284325.t004>

attainment increases, her child is less likely to be stunted. Evidence suggests that both mothers' formal education and nutritional knowledge play an important role in increasing the physical growth and cognitive development of under-five children. Most of the RMG workers received lower levels of education, for instance, about 40% of our respondents had a secondary or higher secondary level of education. Moreover, the questionable quality of the education they receive raises additional concerns in this regard. Literature also suggests that educated mothers have a better quality of life, are more likely to have insights on child diet, receive ANC, and achieve greater physical and financial freedom [8,18,20,21,27–29,35,37,73–75]. Educated women often have autonomy with regard to their personal life, household decisions, resource use, and dignity in their communities [73]. Some authors noted that a mother's formal education is an insignificant factor in a child nutritional status [21,30–32], while Hamel et al. [34] indicated that a mother's practical knowledge about child nutrition might be more important than formal maternal education for child nutritional outcomes. This study also found that as the nutritional knowledge of a mother increases, a child would be less likely to be moderately stunted. Similarly, a caregiver's knowledge of child nutrition plays a significant role in reducing severe stunting. Additionally, if mothers have control over household resources, the child would be more likely to be healthy. Economic freedom may also enable them to decide on buying nutritious foods, availing better housing with improved sanitation and seeking health services. Their control over income may also allow them to buy mechanical gadgets to reduce the time burden of household chores and to share some of the time with their children. However, we found that within the reproductive time, RMG women workers spend relatively more time cooking as they have to perform almost all the work manually. Smith et al. [76] also found that control over financial resources was associated with improvements in child nutrition, while McKenna et al. [67] did not find any significant relationship between financial decision-making power and stunting or wasting in children.

This study shows that ANC plays a significant role in improving a child's nutritional status, similar to the findings of some previous studies [26,34,35]. If a mother received proper ANC during her pregnancy, the child was less likely to suffer from stunting. Two types of care are typically provided under ANC services: clinical care and counselling that provides nutritional advisory

guidelines to pregnant women. Undoubtedly, both play a significant role in ensuring long-term health and nutrition outcomes for the child. Increased access to ANC warrants better physical growth of a child during pregnancy and healthier birth weight, and this may aid in the future weight gain and physical growth of a child. There is a strong intergenerational relationship between birth weight and subsequent gain of length as rationalized by both genetic and environmental influences across generations [25,77]. It could be mentioned here that the RMG workers have minimal access to the ANC services due to their time limitations from high work pressure.

Our study found that children who were born with lower birth weights (LBW) were more likely to be stunted [40]; who also mentioned that LBW was the significant and prominent determinant of stunting after adjusting for other factors such as age and sex, and; children with a history of LBW had 3-fold greater odds of being stunted compared to children with normal birth weight. They also found that the prevalence of LBW was about 29% and approximately half of the children were stunted by the age of 24 months. A study found LBW as a substantial negative predictor for childhood mortality and morbidity [78]. Another study mentioned that in developing countries, LBW is often associated with intrauterine growth restriction (IUGR) and stunting [79]. Likewise, despite a marked improvement in other health-related indicators, Bangladesh is struggling to tackle the burden of chronic malnutrition. Long ago it has reported that birth weight as the key determinant of subsequent growth status during infancy based on a study conducted in a Bangladeshi slum area [80]. Similar to [58], our study also found that once a baby is born underweight, the risk of becoming undernourished increases.

Proper sanitation plays an important role in improving a child as well as household health status. Improper sanitation may lead to the prevalence of soil-transmitted helminths which affect the gastrointestinal tract of a child induced by fecal contamination that can result in impairment in physical development [81]. Most of the RMG workers who accompany their children stay in a crowded dwelling with a shared toilet facility available for 5 to 10 families or even more. Moreover, RMG workers do not have much time to look after their children, which impedes proper and safe sanitation practices. Our results found that children from households with proper sanitation were less likely to be stunted. This may be because proper sanitation can reduce the risk of diarrhoea which reduces the risk of long-term malnutrition [3,20,48–53].

When the parents are away from home for work purposes, the relatives or non-relative caregivers take care of the child. In developed countries, child daycare facilities exist at an affordable cost regardless of socioeconomic class. However, in Bangladesh, childcare facilities are hardly available. Recently, RMG industries have started to introduce it but the quality is very low. As a result, most of the RMG workers do not accompany their children with them as they cannot afford to attend to any relative to take care of the child. As a result, many workers leave their children at their origin. However, if any adult family relative stays with the child when the parents are away, it may minimize the negative outcome of the child's nutritional status. We found that children from large families are less likely to be stunted as there are typically other people to take care of the child. This is in line with the previous study [59,60]. However, there may also be risks to food insecurity within the family when there are more members, which could reverse child nutrition [32,54–58] that can be abated by increasing household income. Yet, it is challenging to maintain a large family with a small income of RMG workers. Thus, an affordable and proper daycare facility could help to ensure adequate nutrition and well-being for the children of RMG women workers in Bangladesh.

## Policy implications

The study found that many RMG workers are malnourished and lack proper ANC during pregnancy. This highlights the need for ANC services to improve mothers' health and

knowledge, which can lead to improved health outcomes for both mother and child. However, RMG workers often lack the time and awareness to access healthcare services, and pregnant workers may be afraid of losing their jobs if they disclose their pregnancy. To address these issues, the government and BGMEA should work together to introduce ANC facilities and mother-friendly organizational rules and legal protections. Counselling for husbands and family members can also increase household cohesiveness.

Improving the socioeconomic status of RMG workers can also lead to better health outcomes for their children. Many RMG households cannot afford proper food and healthcare for their children, leading to stunting and other negative health outcomes. Safety net programs like cash and food transfers can decrease household poverty-related stress and improve their living conditions. Additionally, RMG workers often cannot find suitable childcare arrangements, so the industry should establish quality childcare facilities with trained staff to support working mothers. As the RMG sector continues to expand, it is crucial to provide support and services to protect the health and well-being of these workers and their families.

## Conclusions

The "Made in Bangladesh" tag has brought Bangladesh to the attention of the world. However, this industry relies on millions of resource-constrained and predominantly migrant females, who often have to leave their children to work long hours, making it difficult for them to care for their children. The unanswered strategic questions are: what is the nutritional status of RMG workers' children? How are they growing up? What role does the state play in the future of these citizens? The study's findings suggest that we need to improve the socioeconomic status of mothers working in the RMG industry to improve the nutritional status of their children, who belong to an underprivileged segment of society. To achieve this, rigorous policy interventions are required. Our study results suggest that context-specific strategies should be formulated to reduce growth uncertainty and negative health outcomes.

## Supporting information

**S1 File.**  
(XLSX)

**S2 File.**  
(DOCX)

## Acknowledgments

Authors would like to thank all the respondents for participating, particularly FAO and Professor Dr. Abu Torab and Md. Abdur Rahim, Institute of Nutrition and food science, the University of Dhaka for all support during the current study. We want to express our gratitude to the enumerators who had collected data for this project.

## Author Contributions

**Conceptualization:** Sadika Haque, Dewan Abdullah Al Rafi, Nafisa Zaman, Md. Salman, Md. Abdullah Al Noman, Md. Nazmul Hoque, Lalita Bhattacharjee, Samantha Farquhar, Sabina Yasmin, Md. Mehedi Hasan, Fatema Tuj Zohora Hira, Aunjuman Ara Prithi, Shamim Ara Shammi, Bilkish Banu.

**Data curation:** Sadika Haque, Md. Abdullah Al Noman, Md. Nazmul Hoque, Samantha Farquhar, Sabina Yasmin, Md. Mehedi Hasan, Fatema Tuj Zohora Hira, Aunjuman Ara Prithi, Shamim Ara Shammi, Bilkish Banu, Akbar Hossain.

**Formal analysis:** Sadika Haque, Samantha Farquhar, Sabina Yasmin, Md. Mehedi Hasan, Fatema Tuj Zohora Hira, Aunjuman Ara Prithi, Shamim Ara Shammi, Bilkish Banu, Akbar Hossain.

**Funding acquisition:** Sadika Haque.

**Investigation:** Sadika Haque, Md. Nazmul Hoque.

**Methodology:** Sadika Haque, Dewan Abdullah Al Rafi, Nafisa Zaman, Md. Salman, Md. Nazmul Hoque, Fatema Tuj Zohora Hira.

**Project administration:** Sadika Haque, Lalita Bhattacharjee.

**Resources:** Dewan Abdullah Al Rafi, Lalita Bhattacharjee, Md. Mehedi Hasan, Fatema Tuj Zohora Hira, Aunjuman Ara Prithi, Akbar Hossain.

**Software:** Sadika Haque, Md. Abdullah Al Noman, Md. Nazmul Hoque, Samantha Farquhar, Aunjuman Ara Prithi, Shamim Ara Shammi, Bilkish Banu, Akbar Hossain.

**Validation:** Sadika Haque, Md. Salman, Md. Abdullah Al Noman, Md. Nazmul Hoque, Samantha Farquhar, Sabina Yasmin, Md. Mehedi Hasan, Aunjuman Ara Prithi, Bilkish Banu.

**Visualization:** Sadika Haque, Md. Salman.

**Writing – original draft:** Sadika Haque, Dewan Abdullah Al Rafi, Nafisa Zaman, Md. Salman, Md. Abdullah Al Noman, Md. Nazmul Hoque, Lalita Bhattacharjee, Sabina Yasmin, Md. Mehedi Hasan, Fatema Tuj Zohora Hira, Aunjuman Ara Prithi, Shamim Ara Shammi, Bilkish Banu.

**Writing – review & editing:** Akbar Hossain.

## References

1. Islam T, Halim MA. Impact of ready-made garments (RMG) industries and sustainability: Perspective of the pandemic period in developing country. *Clean Eng Technol.* 2022; 11: 100567. <https://doi.org/10.1016/j.clet.2022.100567>
2. Langer A, Meleis A, Knaul FM, Atun R, Aran M, Arreola-Ornelas H, et al. Women and Health: The key for sustainable development. *Lancet.* 2015; 386: 1165–1210. [https://doi.org/10.1016/S0140-6736\(15\)60497-4](https://doi.org/10.1016/S0140-6736(15)60497-4) PMID: 26051370
3. Haque AKE, Bari E. A Survey Report on the Garment Workers of Bangladesh. 2021. Available: [www.acdonline.org](http://www.acdonline.org).
4. Sikdar M, Sarkar S, Sadeka S. Socio-Economic Conditions of the Female Garment Workers in the Capital City of Bangladesh. *Int J Humanit Soc Sci.* 2014; 4: 173–179. [http://www.ijhssnet.com/journals/Vol\\_4\\_No\\_3\\_February\\_2014/17.pdf](http://www.ijhssnet.com/journals/Vol_4_No_3_February_2014/17.pdf) (Assessed on 03 February, 2023).
5. Alamgir F, Alamgir F, Irina Alamgir F. Live or be left to die? Deregulated bodies and the global production network: Expendable workers of the Bangladeshi apparel industry in the time of Covid. *Organization.* 2022; 29: 478–501. <https://doi.org/10.1177/13505084211028528>
6. UNICEF. The Ready-Made Garment Sector and Children in Bangladesh. 2015; 1–20. [https://www.unicef.org/csr/files/CSR\\_BANGLADESH\\_RMG\\_REPORT.PDF](https://www.unicef.org/csr/files/CSR_BANGLADESH_RMG_REPORT.PDF) (Assessed on 03 February, 2023).
7. Islam MS, Zafar Ullah AN, Mainali S, Imam MA, Hasan MI. Determinants of stunting during the first 1,000 days of life in Bangladesh: A review. *Food Sci Nutr.* 2020; 8: 4685–4695. <https://doi.org/10.1002/fsn3.1795> PMID: 32994930
8. Das S, Gulshan J. Different forms of malnutrition among under five children in Bangladesh: A cross sectional study on prevalence and determinants. *BMC Nutr.* 2017; 3: 1–12. <https://doi.org/10.1186/s40795-016-0122-2>

9. WHO. Stunting in a Nutshell. 2015. p. Available: <https://www.who.int/news/item/19-11-2015-stunting-in-a-nutshell> (Assessed on 03 February, 2023).
10. National Institute of Population Research and Training (NIPORT); ICF International; Bangladesh Demographic and Health Survey 2017–18. Dhaka, Bangladesh, Rockville, Maryland, USA NIPORT ICF. 2028; 1–511.
11. UNICEF. Progarir Pathay Bangladesh: Multiple Indicator Cluster Survey, 2019. Available: [https://www.unicef.org/bangladesh/media/3281/file/Bangladesh%202019%20MICS%20Report\\_English.pdf](https://www.unicef.org/bangladesh/media/3281/file/Bangladesh%202019%20MICS%20Report_English.pdf) (Assessed on 03 February, 2023).
12. Haddad L, Khondker R. Bangladesh will truly be seen as a developed country when it vanquishes undernutrition. 2020. <https://www.gainhealth.org/media/news/bangladesh-will-truly-be-seen-developed-country-when-it-vanquishes-undernutrition> (Assessed on 03 February, 2023).
13. UNICEF/WHO/WORLD BANK. Levels and trends in child malnutrition UNICEF / WHO / World Bank Group Joint Child Malnutrition Estimates Key findings of the 2021 edition. World Heal Organ. 2021; 1–32. <https://www.who.int/publications/i/item/9789240025257> (Assessed on 03 February, 2023).
14. Zongrone A, Winskell K, Menon P. Infant and young child feeding practices and child undernutrition in Bangladesh: insights from nationally representative data. *Public Health Nutr.* 2012; 15: 1697–1704. <https://doi.org/10.1017/S1368980012001073> PMID: 22564370
15. Bairagi R, Chowdhury MK. Socioeconomic and anthropometric status, and mortality of young children in rural Bangladesh. *Int J Epidemiol.* 1994; 23: 1179–1184. <https://doi.org/10.1093/ije/23.6.1179> PMID: 7721520
16. Wali N, Agho KE, Renzaho AMN. Wasting and associated factors among children under 5 years in five south Asian countries (2014–2018): Analysis of demographic health surveys. *Int J Environ Res Public Health.* 2021;18. <https://doi.org/10.3390/ijerph18094578> PMID: 33925898
17. Murad A, Faruque F, Naji A, Tiwari A, Helmi M, Dahlan A. Modelling geographical heterogeneity of diabetes prevalence and socio-economic and built environment determinants in Saudi City—Jeddah. *Geospatial Health.* 2022;17. <https://doi.org/10.4081/gh.2022.1072> PMID: 35579244
18. Talukder A. Factors associated with malnutrition among under-five children: Illustration using bangladesh demographic and health survey, 2014 data. *Children.* 2017;4. <https://doi.org/10.3390/children4100088> PMID: 29048355
19. Sultana P, Rahman MM, Akter J. Correlates of stunting among under-five children in Bangladesh: A multilevel approach. *BMC Nutr.* 2019; 5: 1–12. <https://doi.org/10.1186/s40795-019-0304-9> PMID: 32153954
20. Akombi BJ, Agho KE, Hall JJ, Merom D, Astell-Burt T, Renzaho AMN. Stunting and severe stunting among children under-5 years in Nigeria: A multilevel analysis. *BMC Pediatr.* 2017;17. <https://doi.org/10.1186/s12887-016-0770-z> PMID: 28086835
21. Titaley CR, Ariawan I, Hapsari D, Muasyaroh A. Determinants of the Stunting of Children in Indonesia: A Multilevel Analysis of the 2013 Indonesia Basic Health Survey. *Nutrients.* 2013; 11: 1160.
22. Fletcher D. Perspectives on contemporary radicalism. *The Cultural Contradictions of Anti-Capitalism.* 2018. <https://doi.org/10.4324/9781315461212-2>
23. Khan MS, Halder HR, Rashid M, Afroja S, Islam M. Impact of socioeconomic and demographic factors for underweight and overweight children in Bangladesh: A polytomous logistic regression model. *Clin Epidemiol Glob Heal.* 2020; 8: 1348–1355. <https://doi.org/10.1016/j.cegh.2020.05.010>
24. Rahman MA, Halder HR, Rahman MS, Parvez M. Poverty and childhood malnutrition: Evidence-based on a nationally representative survey of Bangladesh. *PLoS One.* 2021; 16: 1–18. <https://doi.org/10.1371/journal.pone.0256235> PMID: 34424928
25. Rahman MS, Rahman MA, Maniruzzaman M, Howlader MH. Prevalence of undernutrition in Bangladeshi children. *J Biosoc Sci.* 2020; 52: 596–609. <https://doi.org/10.1017/S0021932019000683> PMID: 31658911
26. Siddiqi MNA, Haque MN, Goni MA. Malnutrition of Under-Five Children: Evidence from Bangladesh. *Asian J Med Sci.* 2011; 2: 113–119. <https://doi.org/10.3126/ajms.v2i2.3662>
27. Rahman SMJ, Ahmed NAMEF, Abedin MM, Ahammed B, Ali M, Rahman MJ, et al. Investigate the risk factors of stunting, wasting, and underweight among under-five Bangladeshi children and its prediction based on machine learning approach. *PLoS One.* 2021; 16: 1–11. <https://doi.org/10.1371/journal.pone.0253172> PMID: 34138925
28. Islam MM, Alam M, Tariqzaman M, Kabir MA, Pervin R, Begum M, et al. Predictors of the number of under-five malnourished children in Bangladesh: Application of the generalized poisson regression model. *BMC Public Health.* 2013;13. <https://doi.org/10.1186/1471-2458-13-11> PMID: 23297699

29. Ikeda N, Irie Y, Shibuya K. Determinants of reduced child stunting in Cambodia: analysis of pooled data from three Demographic and Health Surveys. *Bull World Health Organ.* 2013; 91: 341–349. <https://doi.org/10.2471/BLT.12.113381> PMID: 23678197
30. Khan GN, Turab A, Khan MI, Rizvi A, Shaheen F, Ullah A, et al. Prevalence and associated factors of malnutrition among children under-five years in Sindh, Pakistan: A cross-sectional study. *BMC Nutr.* 2016; 2: 1–7. <https://doi.org/10.1186/s40795-016-0112-4>
31. Janevic T, Petrovic O, Bjelic I, Kubera A. Risk factors for childhood malnutrition in Roma settlements in Serbia. *BMC Public Health.* 2010; 10: 509. <https://doi.org/10.1186/1471-2458-10-509> PMID: 20727212
32. Fikadu T., Assegid S. & Dube L. Factors associated with stunting among children of age 24 to 59 months in Meskan district, Gurage Zone, South Ethiopia: a case-control study. *BMC Public Health.* 2014; 14:800. <https://doi.org/10.1186/1471-2458-14-800> PMID: 25098836
33. Appoh LY, Krekling S. Maternal nutritional knowledge and child nutritional status in the Volta Region of Ghana. *Matern Child Nutr.* 2005; 1: 100–110. <https://doi.org/10.1111/j.1740-8709.2005.00016.x> PMID: 16881885
34. Hamel C, Enne J, Omer K, Ayara N, Yarima Y, Cockcroft A, et al. Childhood malnutrition is associated with maternal care during pregnancy and childbirth: A cross-sectional study in Bauchi and cross river states, Nigeria. *J Public Health Res.* 2015; 4: 58–64. <https://doi.org/10.4081/jphr.2015.408> PMID: 25918695
35. Talukder A, Razu SR, Hossain MZ. Factors affecting stunting among children under five years of age in Bangladesh. *Fam Med Prim Care Rev.* 2018; 20: 356–362. <https://doi.org/10.5114/fmpcr.2018.79348>
36. Arulmohi M, Vinayagamoorthy V, R. DA. Physical Violence Against Doctors: A Content Analysis from Online Indian Newspapers. *Indian J Community Med.* 2017; 42: 147–50. <https://doi.org/10.4103/ijcm.IJCM>
37. Rahman MA, Halder HR, Siddiquee T, Farjana SA, Roshid HO, Khan B, et al. Prevalence and determinants of double burden of malnutrition in Bangladesh: evidence from a nationwide cross-sectional survey. *Nutrire.* 2021;46. <https://doi.org/10.1186/S41110-021-00140-W>
38. Cattaneo A, Timmer A, Bomestar T, Bua J, Kumar S, Tamburini G. Child nutrition in countries of the Commonwealth of Independent States: Time to redirect strategies? *Public Health Nutr.* 2008; 11: 1209–1219. <https://doi.org/10.1017/S1368980008003261> PMID: 18647428
39. Van De Poel E, Hosseinpoor AR, Speybroeck N, Van Ourti T, Vega J. Socioeconomic inequality in malnutrition in developing countries. *Bull World Health Organ.* 2008; 86: 282–291. <https://doi.org/10.2471/blt.07.044800> PMID: 18438517
40. Fink G, Günther I, Hill K. The effect of water and sanitation on child health: Evidence from the demographic and health surveys 1986–2007. *Int J Epidemiol.* 2011; 40: 1196–1204. <https://doi.org/10.1093/ije/dyr102> PMID: 21724576
41. Owino V, Ahmed T, Freemark M, Kelly P, Loy A, Manary M, et al. Environmental enteric dysfunction and growth failure/stunting in global child health. *Pediatrics.* 2016;138. <https://doi.org/10.1542/peds.2016-0641> PMID: 27940670
42. Roesler AL, Smithers LG, Wangpakattanawong P, Moore V. Stunting, dietary diversity and household food insecurity among children under 5 years in ethnic communities of northern Thailand. *J Public Heal (United Kingdom).* 2019; 41: 772–780. <https://doi.org/10.1093/pubmed/fdy201> PMID: 30423144
43. Mahmudiono T, Nindya TS, Andrias DR, Megatsari H, Rosenkranz RR. Household food insecurity as a predictor of stunted children and overweight/obese mothers (SCOWT) in Urban Indonesia. *Nutrients.* 2018;10. <https://doi.org/10.3390/nu10050535> PMID: 29701632
44. Esrey SA. Water, waste, and well-being: a multicountry study. *Am J Epidemiol.* 1996; 143: 608–623. <https://doi.org/10.1093/oxfordjournals.aje.a008791> PMID: 8610678
45. Nahar B, Ahmed T, Brown KH, Hossain MI. Risk factors associated with severe underweight among young children reporting to a diarrhoea treatment facility in Bangladesh. *J Heal Popul Nutr.* 2010; 28: 476–483. <https://doi.org/10.3329/jhpn.v28i5.6156> PMID: 20941899
46. Caulfield LE, de Onis M, Blössner M, Black RE. Undernutrition as an underlying cause of child deaths associated with diarrhoea, pneumonia, malaria, and measles. *Am J Clin Nutr.* 2004; 80: 193–198. <https://doi.org/10.1093/ajcn/80.1.193> PMID: 15213048
47. Srinivasan CS, Zanello G, Shankar B. Rural-urban disparities in child nutrition in Bangladesh and Nepal. *BMC Public Health.* 2013; 13: 1–15. <https://doi.org/10.1186/1471-2458-13-581> PMID: 23767425
48. Asfaw M, Wondaferash M, Taha M, Dube L. Prevalence of undernutrition and associated factors among children aged between six to fifty-nine months in Bule Hora district, South Ethiopia. *BMC Public Health.* 2015; 15: 1–9. <https://doi.org/10.1186/s12889-015-1370-9> PMID: 25636688



49. Odunayo SI, Oyewole AO. Risk factors for malnutrition among rural Nigerian children. *Asia Pac J Clin Nutr.* 2006; 15: 491–495. Available: <https://apjcn.nhri.org.tw/server/APJCN/15/4/491.pdf> (Accessed on 15 January 2023). PMID: 17077064
50. Hall A, Hewitt G, Tuffrey V, De Silva N. A review and meta-analysis of the impact of intestinal worms on child growth and nutrition. *Matern Child Nutr.* 2008; 4: 118–236. <https://doi.org/10.1111/j.1740-8709.2007.00127.x> PMID: 18289159
51. Briend A. Is diarrhoea a major cause of malnutrition among the under-fives in developing countries? A review of available evidence. *Eur J Clin Nutr.* 1990; 44: 611–628. PMID: 2261894
52. Torlesse H, Cronin AA, Sebayang SK, Nandy R. Determinants of stunting in Indonesian children: Evidence from a cross-sectional survey indicate a prominent role for the water, sanitation and hygiene sector in stunting reduction. *BMC Public Health.* 2016; 16: 1–11. <https://doi.org/10.1186/s12889-016-3339-8> PMID: 27472935
53. Black RE, Victora CG, Walker SP, Bhutta ZA, Christian P, De Onis M, et al. Maternal and child undernutrition and overweight in low-income and middle-income countries. *Lancet.* 2013; 382: 427–451. [https://doi.org/10.1016/S0140-6736\(13\)60937-X](https://doi.org/10.1016/S0140-6736(13)60937-X) PMID: 23746772
54. García Cruz LM, González Azpeitia G, Reyes Suárez D, Santana Rodríguez A, Loro Ferrer JF, Serra-Majem L. Factors associated with stunting among children aged 0 to 59 months from the central region of Mozambique. *Nutrients.* 2017; 9: 1–16. <https://doi.org/10.3390/nu9050491> PMID: 28498315
55. Leal VS, de Lira PIC, de Menezes RCE, Oliveiral JS, Sequeira LA de S, de Andrade SLLS, et al. Factors associated with the decline in stunting among children and adolescents in Pernambuco, northeastern Brazil. *Rev Saude Publica.* 2012; 46: 234–241. <https://doi.org/10.1590/s0034-89102012005000015> PMID: 22331183
56. Umeta M, West CE, Verhoef H, Haidar J, Hautvast JGAJ. Factors associated with stunting in infants aged 5–11 months in the Dodota-Sire District, Rural Ethiopia. *J Nutr.* 2003; 133: 1064–1069. <https://doi.org/10.1093/jn/133.4.1064> PMID: 12672920
57. Mamabolo RL, Alberts M, Steyn NP, Delemarre-van de Waal HA, Levitt NS. Prevalence and determinants of stunting and overweight in 3-year-old black South African children residing in the Central Region of Limpopo Province, South Africa. *Public Health Nutr.* 2005; 8: 501–508. <https://doi.org/10.1079/phn2005786> PMID: 16153331
58. de Menezes RCE, de Lira PIC, Leal VS, Oliveira JS, da Silva Santana SC, de Souza Sequeira LA, et al. Determinants of stunting in children under five in Pernambuco, northeastern Brazil. *Rev Saude Publica.* 2011; 45: 1079–1087. <https://doi.org/10.1590/s0034-89102011000600010> PMID: 22124738
59. Semali IA, Tengia-Kessy A, Mmbaga EJ, Leyna G. Prevalence and determinants of stunting in under-five children in central Tanzania: Remaining threats to achieving Millennium Development Goal 4. *BMC Public Health.* 2015; 15: 4–9. <https://doi.org/10.1186/s12889-015-2507-6> PMID: 26590803
60. Florence T. Prevalence of Early Childhood Malnutrition and. *Afr J Food Agric Nutr Develop.* 2009; 9: 975–989. <https://doi.org/10.4314/ajfand.v9i4.43872>
61. Naing L, Winn T, Rusli BN. Practical Issues in Calculating the Sample Size for Prevalence Studies. *Arch Orolfac Sci.* 2006; 1: 9–14.
62. Moazzem KG, Radia MA. "Data universe" of Bangladesh's RMG enterprises: key features and limitations. CPD Working Paper 123. CPD Work Pap 123. 2016. <https://cpd.org.bd/wp-content/uploads/2019/01/CPD-Working-Paper-123-Data-Universe-of-Bangladesh-s-RMG-Enterprises.pdf> (Assessed on 03 February, 2023).
63. WHO. WHO Child Growth Standards based on length/height, weight and age. *Acta Paediatr (Oslo, Norw 1992) Suppl.* 2006; 450: 76–85. <https://doi.org/10.1111/j.1651-2227.2006.tb02378.x> PMID: 16817681
64. Islam MM, Sanin KI, Mahfuz M, Ahmed AMS, Mondal D, Haque R, et al. Risk factors of stunting among children living in an urban slum of Bangladesh: Findings of a prospective cohort study. *BMC Public Health.* 2018; 18: 1–13. <https://doi.org/10.1186/s12889-018-5101-x> PMID: 29378556
65. WHO. WHO Child Growth Standards. *Dev Med Child Neurol.* 2009; 51: 1002–1002. <https://doi.org/10.1111/j.1469-8749.2009.03503.x>
66. Sangra S, Nowreen N. Knowledge, attitude, and practice of mothers regarding nutrition of under-five children: A cross-sectional study in rural settings. *Int J Med Sci Public Heal.* 2019; 1. <https://doi.org/10.5455/ijmsph.2019.0306126032019>
67. McKenna CG, Bartels SA, Pablo LA, Walker M. Women's decision-making power and undernutrition in their children under age five in the Democratic Republic of the Congo: A cross-sectional study. *PLoS One.* 2019; 14: 1–19. <https://doi.org/10.1371/journal.pone.0226041> PMID: 31809519

68. World Health Organization. Guidelines on sanitation and health. World Health Organization. 2018. [http://www.who.int/water\\_sanitation\\_health/publications/guidelines-on-sanitation-and-health/en/](http://www.who.int/water_sanitation_health/publications/guidelines-on-sanitation-and-health/en/) (Assessed on 03 February, 2023).
69. Ashikul Islam Pollob SM, Abedin MM, Islam MT, Islam MM, Maniruzzaman M. Predicting risks of low birth weight in Bangladesh with machine learning. *PLoS One*. 2022; 17: 1–12. <https://doi.org/10.1371/journal.pone.0267190> PMID: 35617201
70. Kwak C, Clayton-Matthews A. Multinomial logistic regression. *Nurs Res*. 2002; 51: 404–410. <https://doi.org/10.1097/00006199-200211000-00009> PMID: 12464761
71. Torres-reyna O. Logit, Probit, and Multinomial Logit models in R. Princet Univ. 2014. <http://www.princeton.edu/~otorres/> (Assessed on 03 February, 2023).
72. Changpetch P, Lin DKJ. Selection of multinomial logit models via association rules analysis. *Wiley Interdiscip Rev Comput Stat*. 2013; 5: 68–77. <https://doi.org/10.1002/wics.1242>
73. S H, M S, DAA R, MAA N, MN H, SA S, et al. Providing Antenatal Care Facility is the Most Effective Way to Improve Nutritional Knowledge of Mothers Working in the Ready-Made Garment Industry of Bangladesh. *J Agric Food Environ*. 2022; 03: 26–32. <https://doi.org/10.47440/jafe.2022.3105>
74. Chirande L, Charwe D, Mbwana H, Victor R, Kimboka S, Issaka AI, et al. Determinants of stunting and severe stunting among under-fives in Tanzania: Evidence from the 2010 cross-sectional household survey. *BMC Pediatr*. 2015; 15: 1–13. <https://doi.org/10.1186/s12887-015-0482-9> PMID: 26489405
75. Tiwari R, Ausman LM, Agho KE. Determinants of stunting and severe stunting among under-fives: Evidence from the 2011 Nepal Demographic and Health Survey. *BMC Pediatr*. 2014; 14: 1–15. <https://doi.org/10.1186/1471-2431-14-239> PMID: 25262003
76. Smith LC, Ramakrishnan U, Ndiaye A, Haddad L, Martorell R. The importance of women's status for child nutrition in developing countries. *Res Rep Int Food Policy Res Inst*. 2003; 24: 1–164. <https://doi.org/10.1177/156482650302400309>
77. Sanin KI, Munirul Islam M, Mahfuz M, Shamsir Ahmed AM, Mondal D, Haque R, et al. Micronutrient adequacy is poor, but not associated with stunting between 12–24 months of age: A cohort study findings from a slum area of Bangladesh. *PLoS One*. 2018; 13: 1–17. <https://doi.org/10.1371/journal.pone.0195072> PMID: 29596493
78. Rahman MS, Howlader T, Masud MS, Rahman ML. Association of low-birth weight with malnutrition in children under five years in Bangladesh: Do mother's education, socio-economic status, and birth interval matter? *PLoS One*. 2016; 11: 1–16. <https://doi.org/10.1371/journal.pone.0157814> PMID: 27355682
79. Danaei G, Andrews KG, Sudfeld CR, Fink G, McCoy DC, Peet E, et al. Risk Factors for Childhood Stunting in 137 Developing Countries: A Comparative Risk Assessment Analysis at Global, Regional, and Country Levels. *PLoS Med*. 2016; 13: 1–18. <https://doi.org/10.1371/journal.pmed.1002164> PMID: 27802277
80. Arifeen SE, Black RE, Caulfield LE, Antelman G, Baqui AH, Nahar Q, et al. Infant growth patterns in the slums of Dhaka in relation to birth weight, intrauterine growth retardation, and prematurity. *Am J Clin Nutr*. 2000; 1010–1017. <https://doi.org/10.1093/ajcn/72.4.1010> PMID: 11010945
81. Mascarini-Serra L. Prevention of soil-transmitted helminth infection. *J Glob Infect Dis*. 2011; 3: 175–182. <https://doi.org/10.4103/0974-777X.81696> PMID: 21731306
